# All-*Trans*-Retinoic Acid Modulates Expression Levels of Thyroglobulin and Cytokines in a New Human Poorly Differentiated Papillary Thyroid Carcinoma Cell Line, KTC-1\*

JUNICHI KUREBAYASHI, KATSUHIRO TANAKA, TAKEMI OTSUKI,  
TAKUYA MORIYA, HIRONORI KUNISUE, MASAKO UNO, AND HIROSHI SONOO

Departments of Breast and Thyroid Surgery (J.K., K.T., H.K., H.S.), Hygiene (T.O.), and Radiation Oncology (M.U.), Kawasaki Medical School, Kurashiki, Okayama 701-0192; and Department of Pathology, Tohoku University School of Medicine (T.M.), Sendai, Miyagi 980-8574, Japan

## ABSTRACT

A new human thyroid carcinoma cell line, KTC-1, was established from the malignant pleural effusion of a recurrent thyroid carcinoma patient. Cytogenetic analysis revealed a normal karyotype, and no p53 mutation in exons 5–9 was detected. This cell line is tumorigenic in athymic nude mice. Histological findings by light and electron microscopy, such as the absence of follicular structures and the existence of intranuclear cytoplasmic inclusions and psammoma bodies, indicated transplanted tumors to be a poorly differentiated papillary thyroid carcinoma. A low expression level of thyroglobulin was detected by immunocytochemistry and RT-PCR. Messenger ribonucleic acid (mRNA) expression of thyroid transcription factor-1 and PAX-8

was also detected. No mRNA expression of TSH receptors, thyroid peroxidase, or Na<sup>+</sup>/I<sup>-</sup> symporter was detected. Interleukin-6 and leukemia inhibitory factor were secreted into the medium. These findings suggest this cell line to be functionally poorly differentiated. Moreover, all-*trans*-retinoic acid increased the mRNA expression of thyroglobulin and decreased both the mRNA expression and secretion of interleukin-6 and leukemia inhibitory factor while significantly stimulating growth. RT-PCR analysis of retinoic acid receptors (RARs) revealed that KTC-1 cells express a moderate level of RAR $\alpha$  and - $\gamma$ , but a low level of RAR $\beta$ . This cell line may be useful for studying redifferentiation therapy for thyroid carcinoma. (*J Clin Endocrinol Metab* 85: 2889–2896, 2000)

ALTHOUGH well differentiated thyroid carcinoma is one of the most slow growing of malignancies, undifferentiated thyroid carcinoma grows rapidly, frequently metastasizes to distant organs, and is often fatal (1, 2). It is believed that undifferentiated thyroid carcinoma mostly originates from preexisting, well differentiated thyroid carcinoma. Several molecular mechanisms responsible for this transformation, such as mutations of p53 (3, 4) and  $\beta$ -catenin (5, 6) and Met activation (7), have been proposed. Recently, the clinicopathological importance of poorly differentiated thyroid carcinoma has been reported. Poorly differentiated thyroid carcinoma occasionally coexists with well differentiated thyroid carcinoma and increases the chance of recurrence and recurrence-related death (8, 9).

Several human thyroid carcinoma cell lines have been established and used for studying the cellular and molecular biology of thyroid carcinoma (10–30). Studies have indicated that cell lines originating from well differentiated thyroid carcinoma express thyroid differentiation markers, such as thyroglobulin (Tg), thyroid peroxidase (TPO), and TSH receptors (TSH-R). In contrast, cell lines originating from un-

differentiated thyroid carcinoma do not express such markers, but express various cytokines, such as interleukin-6 (IL-6), colony-stimulating factors, and PTH-related protein (11, 15, 17, 18, 20, 24, 26, 28). No human thyroid carcinoma cell line originating from poorly differentiated thyroid carcinoma, which expresses both the differentiation markers and cytokines, has been reported to date.

We recently isolated a new human thyroid cancer cell line, KTC-1, derived from the malignant pleural effusion of a male patient with recurrent thyroid carcinoma. This cell line grows in a monolayer fashion *in vitro* and is tumorigenic in athymic nude mice. Cytogenetic analysis indicated that this cell line has a normal karyotype. Morphological analyses indicated KTC-1 transplanted tumors to be poorly differentiated papillary thyroid carcinoma. Immunocytochemistry and RT-PCR revealed a low expression level of Tg, but no expression of other differentiation markers, TPO, TSH-R, or Na<sup>+</sup>/I<sup>-</sup> symporter (NIS). Messenger ribonucleic acid (mRNA) expression of thyroid transcription factor-1 (TTF-1) and PAX-8 was also detected by RT-PCR. Biochemical analysis of culture medium revealed that this cell line secretes cytokines, IL-6, and leukemia inhibitory factor (LIF) (31). These findings suggest this cell line to be morphologically and functionally poorly differentiated.

Although disseminated, well differentiated thyroid carcinoma is effectively treated by radioiodine therapy, both poorly differentiated and undifferentiated thyroid carcinomas are resistant to various therapies, including cytotoxic chemotherapy and radiotherapy (2). Some researchers have

Received January 22, 2000. Revision received April 20, 2000. Accepted April 26, 2000.

Address all correspondence and requests for reprints to: Junichi Kurebayashi, M.D., Department of Breast and Thyroid Surgery, Kawasaki Medical School, 577 Matsushima, Kurashiki, Okayama 701-0192, Japan. E-mail: kure@med.kawasaki-m.ac.jp.

\* This work was supported by Research Project Grants 11–104 and 11–303 from Kawasaki Medical School.

indicated the usefulness of redifferentiation therapy using differentiation inducers, such as retinoids, for dedifferentiated thyroid carcinoma (32–34). To clarify the effect of all-*trans*-retinoic acid (ATRA), this newly developed thyroid carcinoma cell line was exposed to this compound, and its effects on differentiation and growth were investigated.

## Materials and Methods

### Patient and cell culture

Reductive thyroidectomy followed by radioiodine and TSH suppression therapies were performed in February 1990 for a 60-yr-old male patient with advanced thyroid cancer with mediastinal lymph node metastases. Pathological examination revealed a well differentiated papillary thyroid carcinoma. Radiotherapy to refractory lymph node metastases was given in October 1994. Right pleural effusion appeared in October 1998. Thoracic drainage was performed to remove the pleural effusion. Cytological analysis showed atypical epithelial cells. Approximately 50 mL of the heparinized effusion were collected for cell culture. After centrifugation, the cell pellet was resuspended with DMEM supplemented with 5% FBS and cultured. Atypical epithelial cells rapidly grew in a monolayer fashion and have been passed at a 1:10 split once or twice a week more than 70 times for over a year. No additional supplement, such as TSH, was needed to maintain these cells.

### Morphological analysis

Cultured cells were observed, and phase contrast microphotographs were taken with an inverted Nikon Diaphot-TMD microscope (Nikon, Tokyo, Japan). Hematoxylin-eosin staining of paraffin-embedded specimens, including cell pellets and transplanted tumors, was performed using the conventional method. Microphotographs were obtained with an Olympus Corp. AH-2 microscope (Olympus Corp., Tokyo, Japan). For transmission electron microscopy, transplanted tumors were resected, minced into blocks 1 mm in size, and fixed with 2.5% glutaraldehyde in PBS for 2 h at 4 C. After being washed with PBS, the blocks were postfixed with 1% osmium tetroxide in 0.1 mol/L cacodylate buffer and embedded in epoxy resin. These blocks were cut into thin sections with a Supernova ultracutter (Reichert-Jung, Vienna, Austria) with a diamond knife, stained with uranyl acetate and lead citrate and examined with a Hitachi H-7100 electron microscope (Hitachi, Tokyo, Japan). For immunocytochemical staining, paraffin sections of tumor samples or cell pellets were dewaxed with xylene, hydrated with phosphate-buffered saline, treated with hydrogen peroxide for elimination of endogenous peroxidase, and then processed by the immunoperoxidase procedure. Rabbit anti-Tg polyclonal antibody (DAKO Corp. Japan, Tokyo, Japan), mouse monoclonal anticytokeratin antibody (Immunotech, Marseilles, France), and mouse monoclonal anti-carcinoembryonic antigen (Takara Biochemicals, Kyoto, Japan) were used as the first antibody. Control experiments were performed by substituting normal rabbit or mouse serum for the first antibody. The reaction was visualized with a Histofine kit (Nichirei, Tokyo, Japan). The sections were also counterstained with methyl green.

### Chromosomal analysis

Cytogenetic analysis was performed at the 5th and 64th passages. Semiconfluent cells were exposed to 0.1  $\mu\text{g}/\text{mL}$  colcemid for 4 h and detached with a trypsin solution. After the addition of a hypotonic solution of 0.075 mol/L potassium chloride, the cells were fixed with 3:1 methanol-acetic acid and stained with Giemsa.

### RT-PCR

Total cellular RNA from KTC-1 cells was extracted with a TRIzol RNA extraction kit (Life Technologies, Inc., Gaithersburg, MD). One microgram of total RNA and 1  $\mu\text{mol}/\text{L}$  oligo(deoxythymidine)<sub>18</sub> primer in 12.5  $\mu\text{L}$  diethyl pirocarbonate-treated water were heated to 70 C for 2 min, followed by cooling on ice for 1 min. Complementary DNA (cDNA) synthesis was initiated with 200 U recombinant Moloney murine leukemia virus reverse transcriptase (CLONTECH Laboratories, Inc., Palo

Alto, CA), and the reaction was allowed to proceed at 42 C for 1 h. The reaction was terminated by heating at 94 C for 5 min. cDNA was dissolved to a final volume of 100  $\mu\text{L}$  by adding 80  $\mu\text{L}$  diethyl pirocarbonate-treated water and then was frozen at  $-20$  C until use. Oligonucleotide primers for the RT-PCR were designed using a published sequence of each target gene and were synthesized by the solid phase triester method. The primers and conditions used and the expected sizes from the reported cDNA sequence are shown in Table 1.

When the effects of ATRA on mRNA expression levels of Tg, IL-6, LIF, and retinoic acid receptors (RARs) and the basal expression levels of TTF-1 and PAX-8 were investigated to amplify both the internal control gene ( $\beta$ -actin) and one of the target genes in a single reaction, multiplex PCR was carried out. The ratios of primer sets between the target gene and the control gene are shown in Table 1. These ratios and the numbers of PCR cycles were determined to amplify both products logarithmically. Because the PCR product size of RAR $\beta$  was close to that of  $\beta$ -actin, glyceraldehyde-3-phosphate dehydrogenase gene (human glyceraldehyde-3-phosphate dehydrogenase Control Amplimer Set, CLONTECH Laboratories, Inc.) was used as the internal control gene for RAR $\beta$ . When mRNA expression levels of thyroid differentiation markers were studied, the single PCR was carried out using samples from normal thyroid gland and well differentiated papillary thyroid carcinoma as the positive controls (35). These samples were also used as the positive controls for the expression study of TTF-1 and PAX-8. In addition, to compare the relative expression levels of RARs, a human breast cancer cell line, KPL-4 (36), was used as a positive control. This cell line was also used as a negative control for the expression study of TTF-1 and PAX-8.

Each PCR reaction contained 1:100 cDNA, the indicated concentrations of primers of each target gene and/or the control gene, 200  $\mu\text{mol}/\text{L}$  deoxynucleotide triphosphates, 10 mmol/L Tris-HCl (pH 8.8), 1.5–2.5 mmol/L MgCl<sub>2</sub>, 50 mmol/L KCl, 0.08% Nonidet P-40, and 1 U recombinant *Thermus aquaticus* DNA polymerase (MBI Fermentas, Vilnius, Lithuania) in a final volume of 20  $\mu\text{L}$ . After an initial denaturation at 94 C for 4 min, various cycles of denaturation (at 94 C for 15 s), annealing (at various temperatures, as shown in Table 1 for 15 s), and extension (at 72 C for 30 s) were performed on a DNA Thermal Cycler 2400 (PC-960G Microplate Gradient Thermal Cycler, Mortlake, Australia). The final extension was performed for 5 min.

After visualization of the PCR products on 1.2% agarose gel stained with ethidium bromide, gel images were obtained using the FAS-II UV image analyzer (TOYOBO Co. Ltd., Tokyo, Japan), and the densities of the products were quantified using Quantity One (version 2.5, PDI, Inc., Huntington Station, NY). The relative expression levels were calculated as the density of the product of the respective target genes divided by that of the control gene.

### Cell growth in vitro

KTC-1 cells ( $2 \times 10^5$  cells/well) were seeded into 12-well plates (SB Medical, Tokyo, Japan) and grown in DMEM supplemented with 5% FBS at 37 C in a 5% CO<sub>2</sub> atmosphere. Triplicate wells were trypsinized every other day, and the cells were enumerated with a Coulter counter (Coulter Electronics, Harpenden, UK).

ATRA was purchased from Sigma (St. Louis, MO) and was dissolved in absolute ethanol at a concentration of 10 mmol/L, stored at  $-20$  C, and protected from light. The final concentration of ethanol in medium was 0.1%.

To investigate the effects of ATRA on cell growth and the secretion of cytokines, KTC-1 cells ( $2 \times 10^5$  cells/well) were seeded in 12-well plates (SB Medical) and grown in DMEM supplemented with 5% FBS at 37 C in a 5% CO<sub>2</sub> atmosphere for 2 days. After being washed with PBS, the cells were incubated with phenol red-free RPMI 1640 supplemented with 2% dextran-coated charcoal-stripped FBS (37) plus 0.1–10  $\mu\text{mol}/\text{L}$  ATRA in the dark for 2 or 4 days to reduce the influences of impurities of phenol red and unknown factors in FBS on the activity of ATRA. After the incubation, the culture medium was collected and stored at  $-80$  C until use, and the cells were enumerated with a Coulter counter.

To investigate the effects of ATRA on mRNA expression levels of thyroid differentiation markers, cytokines, and RARs, after a wash with PBS, semiconfluent KTC-1 cells in six-well plates (SB Medical) were incubated with phenol red-free RPMI 1640 supplemented with 2% dextran-coated charcoal-stripped FBS plus 1  $\mu\text{mol}/\text{L}$  ATRA for 24 h. After the incubation, KTC-1 cells were collected and stored at  $-80$  C until use.

TABLE 1. Primer sequences, conditions, and product sizes for the multiplex RT-PCR

| Target genes | Forward                            | Reverse                             | Annealing temperature (C) | Primer ratio    | No. of PCR cycles <sup>a</sup> | Expected size (bp) |
|--------------|------------------------------------|-------------------------------------|---------------------------|-----------------|--------------------------------|--------------------|
| Tg           | 5'-ggctaagtctacatgtctctg-3'        | 5'-gctctctgttgagatgctgg-3'          | 57                        | 2:1             | 35                             | 231                |
| TSH-R        | 5'-tgaagctgtacaacaacggc-3'         | 5'-tcagttcttcaggctctcc-3'           | 56                        | 2:0.5           | 35                             | 213                |
| TPO          | 5'-gtctgtcaggctgtttatgg-3'         | 5'-caatcaactcggctgttggc-3'          | 57                        | 2:1             | 35                             | 242                |
| NIS          | 5'-tccatgtatggctgaacc-3'           | 5'-cttgaagatgtccagacc-3'            | 60                        | Single PCR used | 40                             | 234                |
| TTF-1        | 5'-acgtgagaagaacatggc-3'           | 5'-ggtggtcttggaacagac-3'            | 61                        | 2:1             | 35                             | 195                |
| PAX-8        | 5'-aaggtggtggagaagattgg-3'         | 5'-gctctctgtgagtcactgc-3'           | 60                        | 2:0.4           | 35                             | 387                |
| IL-6         | 5'-gaactctctccaagcg-3'             | 5'-gaatccagattggaagatcc-3'          | 58                        | 2:0.2           | 40                             | 316                |
| LIF          | 5'-atgaaccagatcaggagcc-3'          | 5'-acagcaegtgtctaaaggag-3'          | 60                        | 2:0.5           | 40                             | 325                |
| RAR-α        | 5'-gcatacaacaagggtgacc-3'          | 5'-gtgtctctgagctgtgtctg-3'          | 59                        | 2:0.4           | 38                             | 261                |
| RAR-β        | 5'-attccagctgaccatcg-3'            | 5'-ggtaattacacagctctgacc-3'         | 58                        | 2:0.5           | 40                             | 560                |
| RAR-γ        | 5'-agctcacaacaaggcagc-3'           | 5'-tctcggctcagccatctcc-3'           | 60                        | 2:0.5           | 33                             | 420                |
| β-actin      | 5'-tgaagggtcaccacactgtcccactcta-3' | 5'-ctagaagcatttgcggtggacgatggagg-3' | NA <sup>b</sup>           | NA              | NA                             | 661                |
| G3PDH        | NK <sup>c</sup>                    | NK                                  | 58                        | 2:0.5           | 40                             | 983                |

<sup>a</sup> Numbers of cycles were determined to amplify both products logarithmically and in relatively similar amounts.

<sup>b</sup> Not assessible.

<sup>c</sup> Not known (the Human G3PDH Control Amplimer Set, CLONTECH Laboratories, was used).

Cell growth in vivo

Semiconfluent KTC-1 cells were trypsinized and harvested, and viable cells were counted in a hemocytometer using trypan blue exclusion. Approximately 5 × 10<sup>6</sup> viable KTC-1 cells were sc inoculated into the dorsal region of 5-week-old female or male nude mice (CLEA Japan, Tokyo, Japan). The three-dimensional tumor size was measured once a week. Tumor volume was calculated as the product of the largest diameter, the orthogonal measurement, and the tumor depth. After the mice had been sacrificed by cervical dislocation, transplanted tumors were resected. After measurement of tumor weight, the resected samples were fixed with 5% buffered formalin and embedded in paraffin for the immunocytochemical and morphological analyses. A part of the sample was fixed with 2.5% glutaraldehyde in PBS for the electron microscopic study.

The animal protocols for these experiments were approved by the animal care and use committee of Kawasaki Medical School.

Measurement of Tg, IL-6, and LIF in culture medium

Tg was measured with an immunoradiometric assay kit (Sanofi Pharmaceuticals, Inc., Diagnostics Pasteur, Marnes La Coquette, France; sensitivity, 1.5 ng/mL). IL-6 was measured with the Quantikine HS immunoassay kit (R&D Systems, Minneapolis, MN; sensitivity, 0.16 pg/mL). LIF was measured with an enzyme-linked immunosorbent assay kit (Amersham Pharmacia Biotech, Aylesbury, UK; sensitivity, 15.6 pg/mL). The secretion of each factor per cell was calculated as the product of each concentration × volume of medium divided by mean cell number.

Single strand conformation polymorphism (SSCP) analysis for p53 mutation

DNA was purified by digestion with proteinase K, extraction with phenol/chloroform, and precipitation by ethanol. PCR amplification of p53 exons 5–9 (hot spots) and SSCP analysis were performed according to the method of Gaidano *et al.* (38). The oligonucleotide primers for exons 5–9 were synthesized by the solid phase triester method and were identical to those used by Gaidano *et al.* (38). PCRs were performed using 100 ng genomic DNA. The products were loaded onto a 6% acrylamide/Tris-borate-EDTA gel containing 10% (vol/vol) glycerol. Autoradiography was performed with an intensifying screen overnight.

Statistical analysis

All values are expressed as the mean ± SE. ANOVA using StatView computer software (ATMS Co., Tokyo, Japan) was used to compare the differences in cell number and secretion of IL-6 and LIF between two groups. A two-sided P value less than 0.05 was considered statistically significant.

Results

Morphological analysis

KTC-1 cells grew in a monolayer fashion like cobble stones with a large nucleus and prominent nucleoli (Fig. 1A). Subcutaneous injections of KTC-1 cells into nude mice produced cystic tumors. Tumor cells associated with diffuse squamous metaplasia lined the cyst wall and occasionally exhibited papillary projections inside the cyst wall. No typical follicular structure was observed (Fig. 1B). Intranuclear cytoplasmic inclusions and psammoma bodies were observed (Fig. 1C). Electron microscopic study revealed large ground glass-like nuclei with cytoplasmic invaginations and intranuclear cytoplasmic inclusions (Fig. 2, A and B). Well developed endoplasmic reticulum, desmosome structures and microvilli were observed (Fig. 2C). These findings were stable during the passages and indicate that the morphological

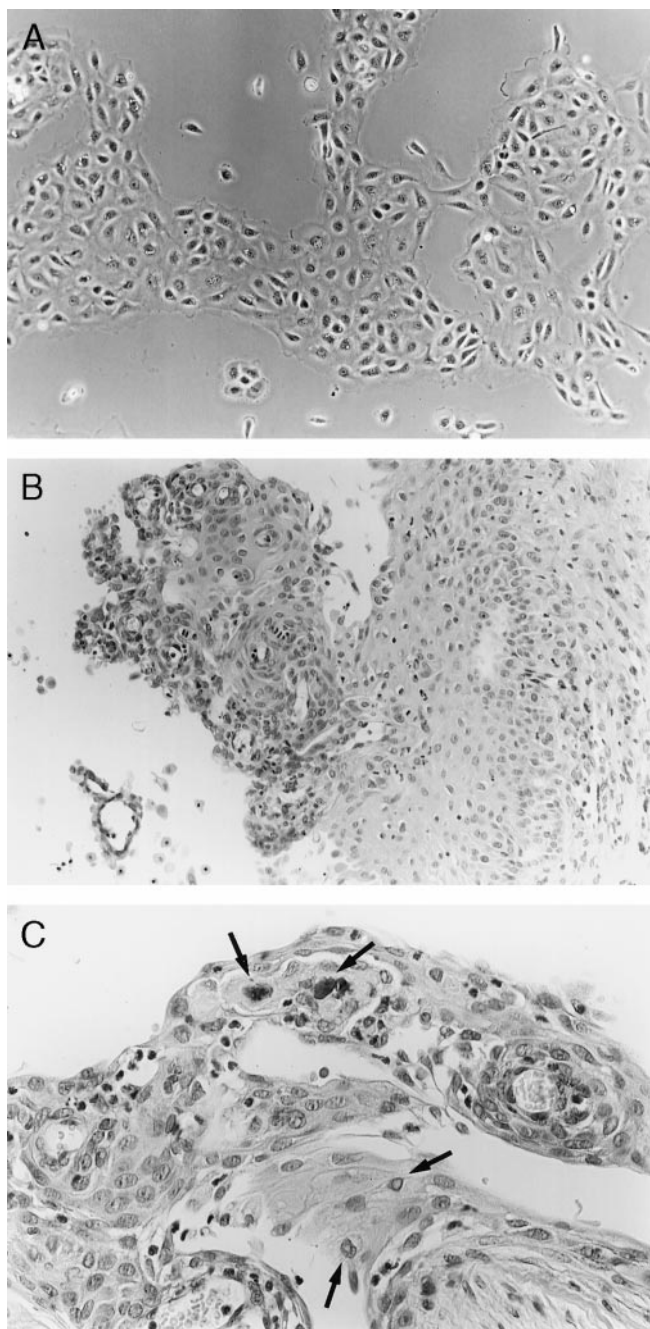

FIG. 1. A, Phase contrast microphotograph of KTC-1 cells *in vitro* (original magnification,  $\times 100$ ). B, Microphotograph of a KTC-1 transplanted tumor (hematoxylin-eosin staining; original magnification,  $\times 80$ ). Note a papillary projection from the cyst wall consisted of tumor cells with squamous metaplasia. C, Microphotograph of a KTC-1 transplanted tumor (hematoxylin-eosin staining; original magnification,  $\times 200$ ). Note the intranuclear pseudo-inclusions and psammoma bodies (arrows).

characteristics of KTC-1 cells are similar to those of poorly differentiated papillary thyroid carcinoma cells.

#### *Karyotype analysis and p53 mutation analysis*

No chromosomal aberration was detected at either the 5th or the 64th passage. This cell line had a normal male karyo-

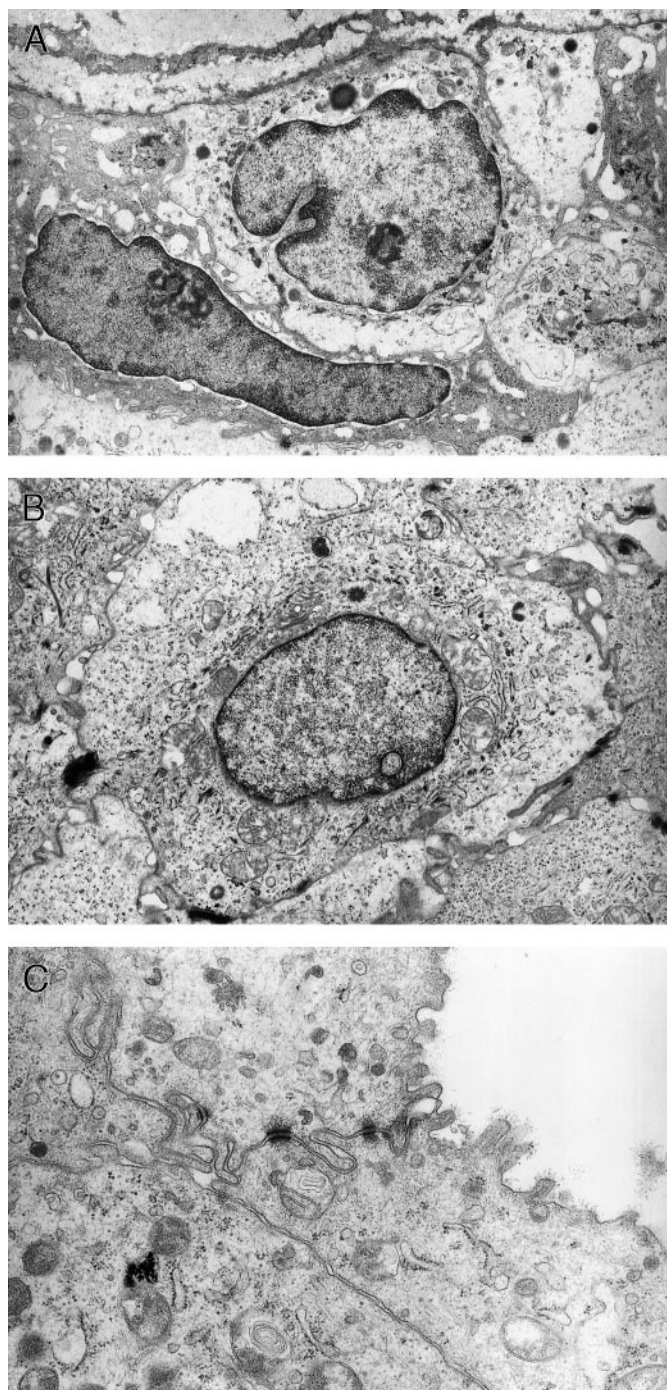

FIG. 2. Electron microphotographs of a KTC-1 transplanted tumor. Note a cytoplasmic invagination (A; original magnification,  $\times 6,000$ ), an intranuclear cytoplasmic inclusion (B; original magnification,  $\times 6,000$ ), and desmosome structures and microvilli (C; original magnification,  $\times 15,000$ ).

type of 46,XY. In addition, no mutation was detected in p53 exons 5–9 by SSCP analysis.

#### *Immunocytochemical analysis*

Strong staining for cytokeratin, weak staining for Tg, and no staining for carcinoembryonic antigen in the cytoplasm

were observed in both KTC-1 cell pellets and transplanted tumors.

*In vitro and in vivo growth*

The population doubling time at the exponential growth phase of KTC-1 cells *in vitro* was approximately 48 h. Subcutaneous injections produced cystic tumors in both male and female nude mice. Tumors, 5 weeks after the cell injections, tended to be smaller in female nude mice ( $34.1 \pm 10.6 \text{ mm}^3$ ;  $n = 7$ ) than in male nude mice ( $482.2 \pm 235.6 \text{ mm}^3$ ;  $n = 10$ ;  $P = 0.14$ ).

*Expression of thyroid differentiation markers, TTF-1, PAX-8, IL-6, and LIF*

A low expression level of Tg mRNA was detected by the RT-PCR method, but no mRNA expression of TSH-R, TPO, or NIS was detected (Fig. 3, lane C). In contrast, mRNA expression of all of these differentiation markers was detected in a well differentiated papillary carcinoma that was used as the positive control (Fig. 3, lane B). In addition, mRNA expression of TTF-1 and PAX-8 was detected in the KTC-1 cell line, normal thyroid tissue, and well differentiated papillary thyroid carcinoma, but not in the KPL-4 breast cancer cell line (Fig. 4). Immunoreactive IL-6 and LIF, but not Tg, were detected in the culture medium by the respective enzyme immunoassay. Basal secretion levels of IL-6 and LIF were  $162 \pm 18$  and  $152 \pm 14 \text{ pg}/1 \times 10^6 \text{ cells}/48 \text{ h}$  ( $n = 3$  each), respectively.

*Effects of ATRA on the KTC-1 cell growth and expression levels of Tg, IL-6, LIF, and RARs*

The treatment with 0.1–10  $\mu\text{mol/L}$  ATRA for 4 days significantly stimulated the growth of KTC-1 cells (Fig. 5). In contrast, the secretion of both IL-6 and LIF into medium was significantly decreased by the same treatment for 2 days (Fig. 6, A and B). Tg was not detectable in the control and treated culture media.

Relative mRNA expression levels of Tg, but not other thyroid differentiation markers, were up-regulated by the treatment with 1  $\mu\text{mol/L}$  ATRA for 24 h (the relative expression ratio of Tg was 0.25 for control and 0.54 for ATRA, respectively; Fig. 7). In contrast, the expression levels of IL-6 and LIF were down-regulated by the same treatment (0.87 for control and 0.23 for ATRA in IL-6; 0.95 for control and 0.67 for ATRA in LIF, respectively; Fig. 7).

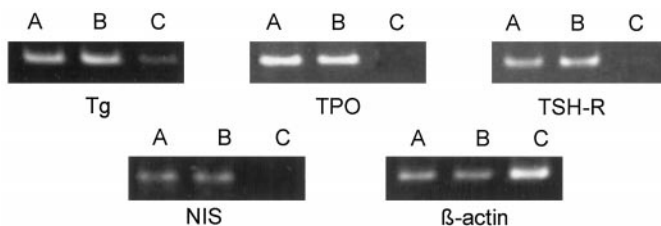

FIG. 3. RT-PCR analysis for Tg, TSH-R, TPO, and NIS in KTC-1 cells (lane C). Note the weak expression of Tg in KTC-1 cells. No expression of TSH-R, TPO, or NIS was detected. Tissue samples of normal thyroid gland (lane A) and well differentiated papillary thyroid carcinoma (lane B) were used as the positive controls.

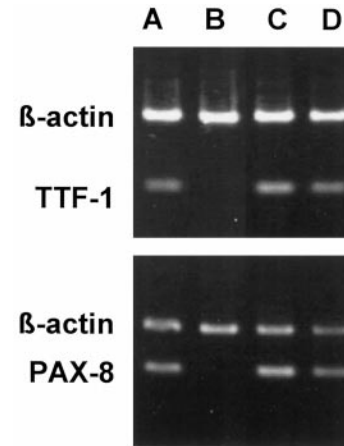

FIG. 4. RT-PCR analysis of TTF-1 and PAX-8 in KTC-1 cells (lane A). A breast cancer cell line, KPL-4 (lane B), was used as a negative control, and tissue samples from normal thyroid gland (lane C) and well differentiated papillary thyroid carcinoma (lane D) were used as the positive controls.

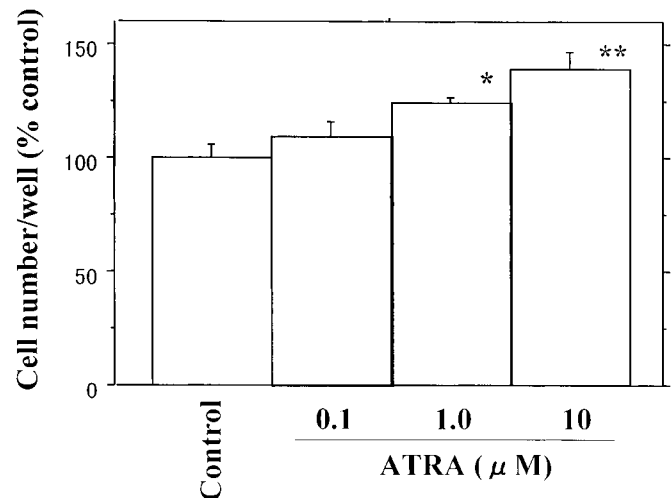

FIG. 5. A dose-dependent growth stimulation of 0.1–10  $\mu\text{mol/L}$  ATRA in KTC-1 cells. KTC-1 cells were incubated with 0.1–10  $\mu\text{mol/L}$  ATRA in phenol red-free RPMI 1640 supplemented with 2% dextran-coated charcoal-stripped FBS for 4 days, and cells were enumerated with a Coulter counter. Values are the mean  $\pm$  SEM of triplicate wells. \*,  $P < 0.05$ ; \*\*,  $P < 0.01$ .

To investigate the relative expression levels of RARs and the changes produced by 1  $\mu\text{mol/L}$  ATRA for 24 h, multiplex RT-PCR analysis for RAR $\alpha$ , - $\beta$ , and - $\gamma$  was also performed. Basal expression levels of RAR $\alpha$  and - $\gamma$  in KTC-1 cells were comparable to those in KPL-4 human breast cancer cells, but the basal expression level of RAR $\beta$  was much lower in KTC-1 cells than in KPL-4 cells (0.29 for KTC-1 and 0.91 for KPL-4, respectively; Fig. 8). ATRA did not significantly change the expression levels of RARs.

**Discussion**

Well characterized cancer cell lines are essential research resources for studying cancer cell biology as well as developing new strategies against cancer. Many thyroid carcinoma cell lines have been established for studying thyroid

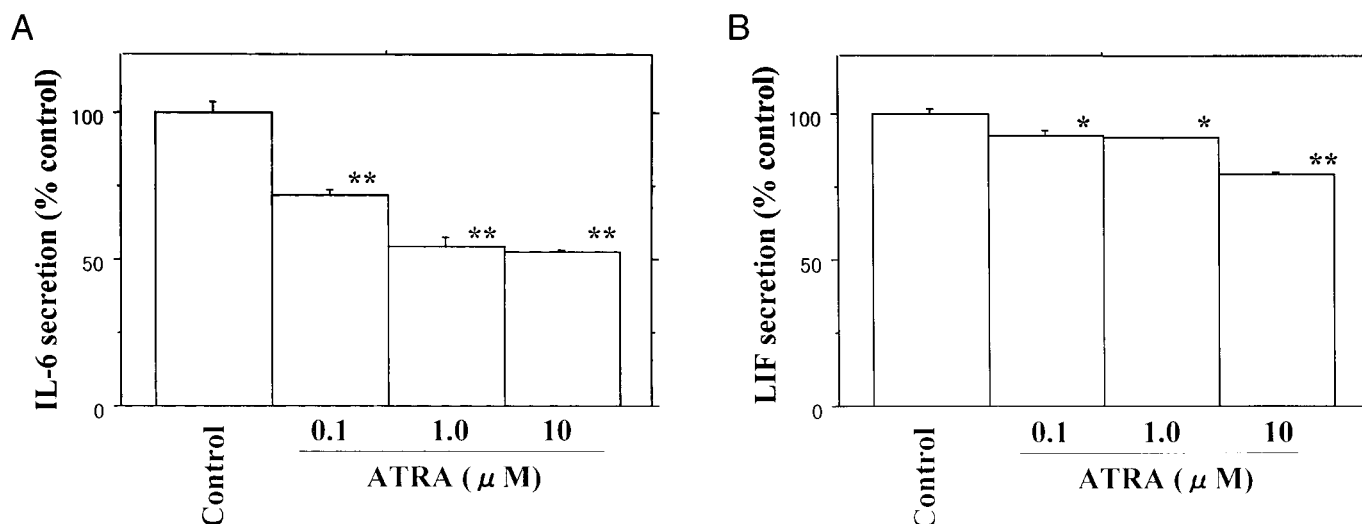

FIG. 6. Inhibition of IL-6 and LIF secretion from KTC-1 cells by 0.1–10  $\mu\text{mol/L}$  ATRA. Semiconfluent KTC-1 cells were incubated with 0.1–10  $\mu\text{mol/L}$  ATRA for 2 days. The culture medium was collected, IL-6 and LIF concentrations were measured by the respective immunoassays, and secretion of each factor was calculated as described in *Materials and Methods*. Values are the mean  $\pm$  SEM of triplicate wells. \*,  $P < 0.05$ ; \*\*,  $P < 0.01$ .

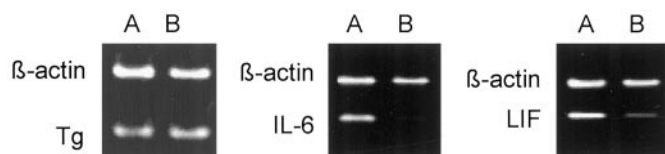

FIG. 7. Effects of ATRA on the mRNA expression levels of Tg, IL-6, and LIF in KTC-1 cells. Lanes A, PCR product of each target gene for control cells; lanes B, that for ATRA-treated cells. To investigate changes in the mRNA expression levels, semiconfluent KTC-1 cells were incubated with 1  $\mu\text{mol/L}$  ATRA for 24 h. After the incubation, KTC-1 cells were collected, and total RNA was extracted. Multiplex RT-PCR for each target gene was performed as described in *Materials and Methods*.

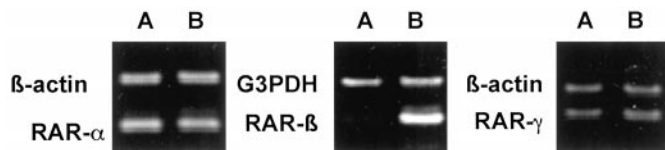

FIG. 8. Basal mRNA expression levels of RARs in KTC-1 cells (lane A) and the KPL-4 human breast cancer cells (lane B). Multiplex RT-PCR for each target gene was performed as described in *Materials and Methods*.

cancer cell biology (10–30). However, most of these cell lines were categorized as undifferentiated or well differentiated. Only one cell line, named SMP, was reported to be poorly differentiated, and no data on the expression of thyroid differentiation markers and the morphology of this cell line were presented (15).

KTC-1 cells in nude mice showed morphological characteristics similar to those commonly observed in papillary thyroid carcinoma. Histological findings indicated transplanted tumors to be a poorly differentiated papillary thyroid carcinoma. In addition, KTC-1 cells express TTF-1, PAX-8, and Tg, but no other thyroid differentiation markers, and secrete cytokines, IL-6, and LIF into culture medium. It has been reported that undifferentiated thyroid carcinoma

cells secrete cytokines, such as IL-6 (11, 20). These findings support the idea that the KTC-1 cell line is originated from a poorly differentiated papillary thyroid carcinoma. There is no report that a thyroid carcinoma cell line secretes LIF, one of the cachexia-associated cytokines (31), into culture medium.

This KTC-1 cell line was found to have characteristics unique from those of previously reported thyroid carcinoma cell lines, including 1) a normal karyotype and no p53 mutation; 2) tumorigenicity in both male and female nude mice, producing cystic tumors; 3) morphological characteristics similar to those of papillary thyroid carcinoma; and 4) ability to express Tg but no other thyroid differentiation markers on the other hand secreting IL-6 and LIF into culture medium.

Karyotype analysis was informative in 9 published reports of the 21 reports cited above (10, 11, 18, 19, 23, 25, 26, 29, 30). None of the cell lines showed a normal karyotype. However, minute chromosomal aberrations are difficult to detect using conventional Giemsa staining. Comparative genomic hybridization of the KTC-1 cell line is under investigation.

Mutation analysis of p53 proved informative in only 2 of the 21 reports. A papillary thyroid carcinoma cell line, B-CPAP, showed immunoreactivity against mutant p53 protein (16). SSCP analysis of p53 in exons 5–8 was performed in 3 undifferentiated and 1 poorly differentiated thyroid carcinoma cell lines. Only 1 undifferentiated thyroid carcinoma cell line, KOA2, showed p53 mutation (15). Otherwise, some reports have suggested that p53 mutations are associated with poorly differentiated or undifferentiated thyroid carcinoma (3, 4).

Tumorigenicity was informative in 10 of the 21 reports (10, 11, 14, 16–19, 25, 29, 30). All of the cell lines were tumorigenic in various immunodeficient mice, such as athymic nude mice and SCID (severe combined immunodeficiency) mice, and produced solid tumors. The KTC-1 cell line is the only line to produce cystic tumors in nude mice. No study has compared the growth of transplanted tumors between male and female nude mice. It should be noted that the KTC-1 cell line, which was derived from a male patient, seemed to grow

faster in male nude mice than in female nude mice. Further studies are needed to clarify this interesting phenomenon.

Morphological analysis of transplanted tumors was informative in the same 10 reports (10, 11, 14, 16–19, 25, 29, 30). Only 1 report indicated the existence of a cytoplasmic invagination in transplanted tumor cells of a papillary thyroid carcinoma cell line, B-CPAP (16). In contrast, not only cytoplasmic invaginations, but also intranuclear cytoplasmic inclusions in KTC-1 cells, were demonstrated by the electron microscopic study. Psammoma bodies were also observed by light microscope.

Only recent studies have conducted a systemic analysis of thyroid differentiation markers. In the 21 reports, Tg expression was detected in 10 human papillary, follicular, or Hurthle cell thyroid cancer cell lines by enzyme-linked immunosorbent assay, immunohistochemistry, RT-PCR, or Northern blotting (10, 13, 16, 22, 25). A weak TSH-R expression was detected by Northern blotting in 1 undifferentiated cell line, Hth 74 (21), of 12 cell lines examined. No expression of TPO was detected by Northern blotting in 11 cell lines tested (12, 13). No expression of NIS was detected by Northern blotting in 4 cell lines (12). In general, expression levels of thyroid differentiation markers, except Tg, are very low in human thyroid carcinoma cell lines. It is possible that long-term culture *in vitro* decreases the expression levels.

IL-6 is a multifunctional cytokine and was reported to be involved in cancer-associated cachexia (39, 40). It was reported that only two undifferentiated thyroid carcinoma cell lines secrete IL-6 into medium (11, 20). The regulation of IL-6 secretion from these cell lines has yet to be investigated. LIF was also reported to be involved in cancer-associated cachexia (31). There is no report of LIF expression in thyroid carcinoma cell lines. Secretion of cytokines, such as IL-6, LIF, colony-stimulating factors, and PTH-related protein, from advanced thyroid carcinoma may induce various paraneoplastic syndromes, such as cachexia, hypercalcemia, and asthenia, and may worsen the patient's quality of life. Therefore, the regulation of expression of these factors in thyroid carcinoma cells should be investigated to develop new therapeutic strategies against these paraneoplastic syndromes. In the present study ATRA significantly inhibited the secretion of IL-6 and LIF from KTC-1 cells. Anticachexic effects of retinoids might be expected in patients with advanced thyroid carcinoma.

ATRA has been under investigation as a redifferentiation agent for the treatment of patients with advanced dedifferentiated thyroid carcinomas that no longer respond to TSH suppression therapy and radioiodine therapy (32–34). Some experimental studies have supported the efficacy of this strategy (41–43). It has been reported that retinoids increased radioiodine uptake and TSH-binding activity in a follicular thyroid carcinoma cell line (41); induced 5'-deiodinase activity, a functional differentiation parameter, in a follicular thyroid carcinoma cell line, but not in an undifferentiated thyroid carcinoma cell line (42); and increased NIS expression in two follicular thyroid carcinoma cell lines, but not in an undifferentiated thyroid carcinoma cell line (43). These findings prompted us to investigate the redifferentiation activity of ATRA in the KTC-1 cell line.

Unexpectedly, treatment with 0.1–10  $\mu\text{mol/L}$  ATRA for 4

days significantly stimulated the growth of KTC-1 cells. Because a recent study suggests that treatment conditions strongly influence the antiproliferative effects of retinoids (44), we decided to use phenol red-free medium supplemented with 2% dextran-coated charcoal-stripped FBS to reduce the effects of impurity of phenol red and unknown factors in serum. However, no remarkable difference in the growth-modulating effects of ATRA was observed between phenol red-containing medium supplemented with 5% FBS (data not shown) and the above-mentioned medium tested. Several studies have suggested that cell growth inhibition accompanied redifferentiation by retinoids in various cell lines (44–54). Recently, it has been suggested that the expression of RAR $\beta$  in some cancer cell lines is required and sufficient to confer retinoid-mediated growth inhibition (45, 46, 55, 56). The relative expression level of RAR $\beta$  of KTC-1 cells was much lower than that of a human breast cancer cell line, KPL-4. The low expression level of RAR $\beta$  in KTC-1 cells might be responsible for the unexpected growth stimulatory effects of ATRA. However, some other reports suggest the complex interaction of retinoids with peroxisome proliferation-activated receptor- $\gamma$ 1, Stat1, and RAR $\gamma$ 1 (57–59). Further studies are needed to elucidate the mechanisms responsible for the growth stimulatory effects of ATRA on the KTC-1 cell line.

In contrast, ATRA increased the mRNA expression levels of Tg in KTC-1 cells, but not those of other thyroid differentiation markers. Because discrepancy in the effects of certain agents on cell differentiation and proliferation has been reported (60–62), these results are not surprising. Signaling pathways responsible for cell growth and differentiation might dissociate in the KTC-1 cell line. It should be noted that in the present study only short-term (24-h) effects of ATRA were investigated. Long-term exposure of retinoids to the KTC-1 cells might produce other findings, as indicated by a recent report (63). However, it has been suggested that a restoration of Tg synthesis can be addressed as a redifferentiation parameter in advanced thyroid carcinoma patients treated with retinoids (32). Further studies of the induction of Tg expression by other differentiation inducers are warranted.

## References

- Hundahl SA, Fleming ID, Fremgen AM, Menck HR. 1998 A National Cancer Data Base report on 53,856 cases of thyroid carcinoma treated in the U.S., 1985–1995. *Cancer*. 83:2638–2648.
- Ain KB. 1998 Anaplastic thyroid carcinoma: a therapeutic challenge. *Semin Surg Oncol*. 16:64–69.
- Nakamura T, Yana I, Kobayashi T, et al. 1992 p53 gene mutations associated with anaplastic transformation of human thyroid carcinomas. *Jpn J Cancer Res*. 83:1293–1298.
- Fagin JA, Matsuo K, Karmakar A, et al. 1993 High prevalence of mutations of the p53 gene in poorly differentiated human thyroid carcinomas. *J Clin Invest*. 91:179–184.
- Husmark J, Heldin NE, Nilsson M. 1999 N-cadherin-mediated adhesion and aberrant catenin expression in anaplastic thyroid-carcinoma cell lines. *Int J Cancer*. 83:692–699.
- Garcia-Rostan G, Tallini G, Herrero A, D'Aquila TG, Carcangiu ML, Rimm DL. 1999 Frequent mutation and nuclear localization of beta-catenin in anaplastic thyroid carcinoma. *Cancer Res*. 59:1811–1815.
- Bergstrom JD, Hermansson A, Diaz de Stahl T, Heldin NE. 1999 Non-autocrine, constitutive activation of Met in human anaplastic thyroid carcinoma cells in culture. *Br J Cancer*. 80:650–656.
- Pilotti S, Collini P, Manzari A, Marubini E, Rilke F. 1995 Poorly differentiated forms of papillary thyroid carcinoma: distinctive entities or morphological patterns? *Semin Diagn Pathol*. 12:249–255.
- Nishida T, Katayama S, Tsujimoto M, Nakamura J, Matsuda H. 1999 Clin-

- icopathologic significance of poorly differentiated thyroid carcinoma. *Am J Surg Pathol.* 23:205–211.
10. Zielke A, Tezelman S, Jossart GH, et al. 1998 Establishment of a highly differentiated thyroid cancer cell line of Hurthle cell origin. *Thyroid.* 8:475–483.
  11. Fiore L, Pollina LE, Fontanini G, et al. 1997 Cytokine production by a new undifferentiated human thyroid carcinoma cell line, FB-1. *J Clin Endocrinol Metab.* 82:4094–4100.
  12. Ohta K, Pang XP, Berg L, Hershman JM. 1997 Growth inhibition of new human thyroid carcinoma cell lines by activation of adenylate cyclase through the  $\beta$ -adrenergic receptor. *J Clin Endocrinol Metab.* 82:2633–2638.
  13. Ohta K, Pang XP, Berg L, Hershman JM. 1996 Antitumor actions of cytokines on new human papillary thyroid carcinoma cell lines. *J Clin Endocrinol Metab.* 81:2607–2612.
  14. Lin JD, Chao TC, Weng HF, Huang HS, Ho YS. 1996 Establishment of xenografts and cell lines from well-differentiated human thyroid carcinoma. *J Surg Oncol.* 63:112–118.
  15. Asakawa H, Kobayashi T, Komoike Y, et al. 1996 Establishment of anaplastic thyroid carcinoma cell lines useful for analysis of chemosensitivity and carcinogenesis. *J Clin Endocrinol Metab.* 81:3547–3552.
  16. Fabien N, Fusco A, Santoro M, Barbier Y, Dubois PM, Paulin C. 1994 Description of a human papillary thyroid carcinoma cell line. Morphologic study and expression of tumoral markers. *Cancer.* 73:2206–2212.
  17. Oka Y, Kobayashi T, Fujita S, et al. 1993 Establishment of a human anaplastic thyroid cancer cell line secreting granulocyte colony-stimulating factor in response to cytokines. *In Vitro Cell Dev Biol Anim.* 29A:537–542.
  18. Palyi I, Peter I, Daubner D, Vincze B, Lorincz I. 1993 Establishment, characterization and drug sensitivity of a new anaplastic thyroid carcinoma cell line (BHT-101). *Virchows Arch B Cell Pathol.* 63:263–269.
  19. Grimm D, Hofstadter F, Bauer J, et al. 1992 Establishment and characterization of a human papillary thyroid carcinoma cell line with oxyphilic differentiation (ONCO-DG 1). *Virchows Arch B Cell Pathol.* 62:97–104.
  20. Tohyama K, Yoshida Y, Ohashi K, et al. 1992 Production of multiple growth factors by a newly established human thyroid carcinoma cell line. *Jpn J Cancer Res.* 83:153–158.
  21. Heldin NE, Cvejic D, Smeds S, Westermark B. 1991 Coexpression of functionally active receptors for thyrotropin and platelet-derived growth factor in human thyroid carcinoma cells. *Endocrinology.* 129:2187–2193.
  22. Goretzki PE, Frilling A, Simon D, Roehrer HD. 1990 Growth regulation of normal thyroids and thyroid tumors in man. *Recent Results Cancer Res.* 118:48–63.
  23. Pfragner R, Hofler H, Behmel A, Ingolic E, Walsler V. 1990 Establishment and characterization of continuous cell line MTC-SK derived from a human medullary thyroid carcinoma. *Cancer Res.* 50:4160–4166.
  24. Enomoto T, Sugawa H, Inoue D, et al. 1990 Establishment of a human undifferentiated thyroid cancer cell line producing several growth factors and cytokines. *Cancer.* 65:1971–1979.
  25. Estour B, Van Herle AJ, Juillard GJ, et al. 1989 Characterization of a human follicular thyroid carcinoma cell line (UCLA RO 82 W-1). *Virchows Arch B Cell Pathol.* 57:167–174.
  26. Mark J, Ekedahl C, Dahlenfors R, Westermark B. 1987 Cytogenetical observations in five human anaplastic thyroid carcinomas. *Hereditas.* 107:163–174.
  27. Nakamura A, Kakudo K, Watanabe K. 1987 Establishment of a new human thyroid medullary carcinoma cell line. Morphological studies. *Virchows Arch B Cell Pathol.* 53:332–335.
  28. Okabe T, Nomura H, Oshawa N. 1982 Establishment and characterization of a human colony-stimulating factor-producing cell line from a squamous cell carcinoma of the thyroid gland. *J Natl Cancer Inst.* 69:1235–1243.
  29. Hirose M. 1968 Tissue culture of human thyroid cancer. *Acta Med Okayama.* 22:185–202.
  30. Jones GW, Simkovic D, Biedler JL, Southam CM. 1967 Human anaplastic thyroid carcinoma in tissue culture. *Proc Soc Exp Biol Med.* 126:426–428.
  31. Mori M, Yamaguchi K, Honda S, et al. 1991 Cancer cachexia syndrome developed in nude mice bearing melanoma cells producing leukemia-inhibitory factor. *Cancer Res.* 51:6656–6659.
  32. Grunwald F, Menzel C, Bender H, et al. 1998 Redifferentiation therapy-induced radioiodine uptake in thyroid cancer. *J Nucl Med.* 39:1903–1906.
  33. Grunwald F, Pakos E, Bender H, et al. 1998 Redifferentiation therapy with retinoic acid in follicular thyroid cancer. *J Nucl Med.* 39:1555–1558.
  34. Simon D, Koehle J, Reiners C, et al. 1998 Redifferentiation therapy with retinoids: therapeutic option for advanced follicular and papillary thyroid carcinoma. *World J Surg.* 22:569–574.
  35. Tanaka K, Otsuki T, Sonoo H, et al. 2000 Semi-quantitative comparison of the differentiation markers and sodium iodide symporter in papillary thyroid carcinomas using RT-PCR method. *Eur J Endocrinol.* 142:340–346.
  36. Kurebayashi J, Otsuki T, Tang CK, et al. 1999 Isolation and characterisation of a new human breast cancer cell line, KPL-4, expressing the Erb B family receptors and interleukin-6. *Br J Cancer.* 79:707–717.
  37. Kurebayashi J, Otsuki T, Yamamoto S, et al. 1998 A pure antiestrogen, ICI 182,780, stimulates the growth of tamoxifen-resistant KPL-1 human breast cancer cells *in vivo* but not *in vitro*. *Oncology.* 55S1:23–34.
  38. Gaidano G, Ballerini P, Gong JZ, et al. 1991 p53 mutations in human lymphoid malignancies: association with Burkitt lymphoma and chronic lymphocytic leukemia. *Proc Natl Acad Sci USA.* 88:5413–5417.
  39. Strassmann G, Fong M, Kenney JS, Jacob CO. 1992 Evidence for the involvement of interleukin 6 in experimental cancer cachexia. *J Clin Invest.* 89:1681–1684.
  40. Kurebayashi J, Yamamoto S, Otsuki T, Sonoo H. 1999 Medroxyprogesterone acetate inhibits interleukin-6 secretion from KPL-4 human breast cancer cell line both *in vitro* and *in vivo*: a possible mechanism of the anti-cachectic effect. *Br J Cancer.* 79:631–636.
  41. Van Herle AJ, Agatep ML, Padua III DN, et al. 1990 Effects of 13-*cis*-retinoic acid on growth and differentiation of human follicular carcinoma cells (UCLA RO 82 W-1) *in vitro*. *J Clin Endocrinol Metab.* 71:755–763.
  42. Schreck R, Schnieders F, Schmutzler C, Koehle J. 1994 Retinoids stimulate type I iodothyronine 5'-deiodinase activity in human follicular thyroid carcinoma cell lines. *J Clin Endocrinol Metab.* 79:791–798.
  43. Schmutzler C, Winzer R, Meissner-Weigl J, Koehle J. 1997 Retinoic acid increases sodium/iodide symporter mRNA levels in human thyroid cancer cell lines and suppresses expression of functional symporter in nontransformed FRTL-5 rat thyroid cells. *Biochem Biophys Res Commun.* 240:832–838.
  44. El-Metwally TH, Adrian TE. 1999 Optimization of treatment conditions for studying the anticancer effects of retinoids using pancreatic adenocarcinoma as a model. *Biochem Biophys Res Commun.* 257:596–603.
  45. Wan H, Oridate N, Lotan D, Hong WK, Lotan R. 1999 Overexpression of retinoic acid receptor beta in head and neck squamous cell carcinoma cells increases their sensitivity to retinoid-induced suppression of squamous differentiation by retinoids. *Cancer Res.* 59:3518–3526.
  46. Xu XC, Liu X, Tahara E, Lippman SM, Lotan R. 1999 Expression and up-regulation of retinoic acid receptor- $\beta$  is associated with retinoid sensitivity and colony formation in esophageal cancer cell lines. *Cancer Res.* 59:2477–2483.
  47. Defacque H, Piquemal D, Basset A, Marti J, Commes T. 1999 Transforming growth factor- $\beta$ 1 is an autocrine mediator of U937 cell growth arrest and differentiation induced by vitamin D<sub>3</sub> and retinoids. *J Cell Physiol.* 178:109–119.
  48. Robertson KA, Hill DP, Kelley MR, et al. 1998 The myeloid zinc finger gene (MZF-1) delays retinoic acid-induced apoptosis and differentiation in myeloid leukemia cells. *Leukemia.* 12:690–698.
  49. Naka K, Yokozaki H, Domen T, et al. 1998 Growth inhibition of cultured human gastric cancer cells by 9-*cis*-retinoic acid with induction of cdk inhibitor Waf1/Cip1/Sdi1/p21 protein. *Differentiation.* 61:313–320.
  50. Giannini G, Dawson MI, Zhang X, Thiele CJ. 1997 Activation of three distinct RXR/RAR heterodimers induces growth arrest and differentiation of neuroblastoma cells. *J Biol Chem.* 272:26693–26701.
  51. Kubohara Y. 1997 DIF-1, putative morphogen of *D. discoideum*, suppresses cell growth and promotes retinoic acid-induced cell differentiation in HL-60. *Biochem Biophys Res Commun.* 236:418–422.
  52. Mossuz P, Prandini MH, Leroux D, et al. 1997 Effects of retinoic acid on a new human erythromegakaryocytic cell line AP-217. *Leuk Res.* 21:529–537.
  53. Egawa N, Maillet B, VanDamme B, De Greve J, Kloppel G. 1996 Differentiation of pancreatic carcinoma induced by retinoic acid or sodium butyrate: a morphological and molecular analysis of four cell lines. *Virchows Arch.* 429:59–68.
  54. Cosgaya JM, Garcia-Villalba P, Perona R, Aranda A. 1996 Comparison of the effects of retinoic acid and nerve growth factor on PC12 cell proliferation, differentiation, and gene expression. *J Neurochem.* 66:89–98.
  55. Nicke B, Riecken EO, Rosewicz S. 1999 Induction of retinoic acid receptor  $\beta$  mediates growth inhibition in retinoid resistant human colon carcinoma cells. *Gut.* 45:51–57.
  56. Hoffman AD, Engelstein D, Bogenrieder T, et al. 1996 Expression of retinoic acid receptor  $\beta$  in human renal cell carcinomas correlates with sensitivity to the antiproliferative effects of 13-*cis*-retinoic acid. *Clin Cancer Res.* 2:1077–1082.
  57. Zhu L, Gong B, Bisgaier CL, Aviram M, Newton RS. 1998 Induction of PPAR $\gamma$ 1 expression in human THP-1 monocytic leukemia cells by 9-*cis*-retinoic acid is associated with cellular growth suppression. *Biochem Biophys Res Commun.* 251:842–848.
  58. Pelicano L, Brumpt C, Pitha PM, Chelbi-Alix MK. 1999 Retinoic acid resistance in NB4 APL cells is associated with lack of interferon  $\alpha$  synthesis Stat1 and p48 induction. *Oncogene.* 18:3944–3953.
  59. Ferrari N, Pfahl M, Levi G. 1998 Retinoic acid receptor  $\gamma$ 1 (RAR $\gamma$ 1) levels control RAR $\beta$ 2 expression in SK-N-BE2(c) neuroblastoma cells and regulate a differentiation-apoptosis switch. *Mol Cell Biol.* 18:6482–6492.
  60. Lessor T, Yoo JY, Davis M, Hamburger AW. 1998 Regulation of heregulin  $\beta$ 1-induced differentiation in a human breast carcinoma cell line by the extracellular-regulated kinase (ERK) pathway. *J Cell Biochem.* 70:587–595.
  61. Tsurusawa M, Fujimoto T. 1995 Cell cycle progression and phenotypic modification of K167 antigen-negative G1- and G2-phase cells in phorbol ester-treated Molt-4 human leukemia cells. *Cytometry.* 20:146–153.
  62. Matsumoto K, Hashimoto K, Hashiro M, Yoshimasa H, Yoshikawa K. 1990 Modulation of growth and differentiation in normal human keratinocytes by transforming growth factor- $\beta$ . *J Cell Physiol.* 145:95–101.
  63. Dierov J, Sawaya BE, Prośniak M, Gartenhaus RB. 1999 Retinoic acid modulates a bimodal effect on cell cycle progression in human adult T-cell leukemia cells. *Clin Cancer Res.* 5:2540–2547.
